# Supplementary material for: A peripheral lipid sensor GPR120 remotely contributes to suppression of PGD2-microglia-provoked neuroinflammation and neurodegeneration in the mouse hippocampus
Source: PubMed Central journal article supplement (PMC8711188; doi:10.1186/s12974-021-02361-2), 2021-12-27

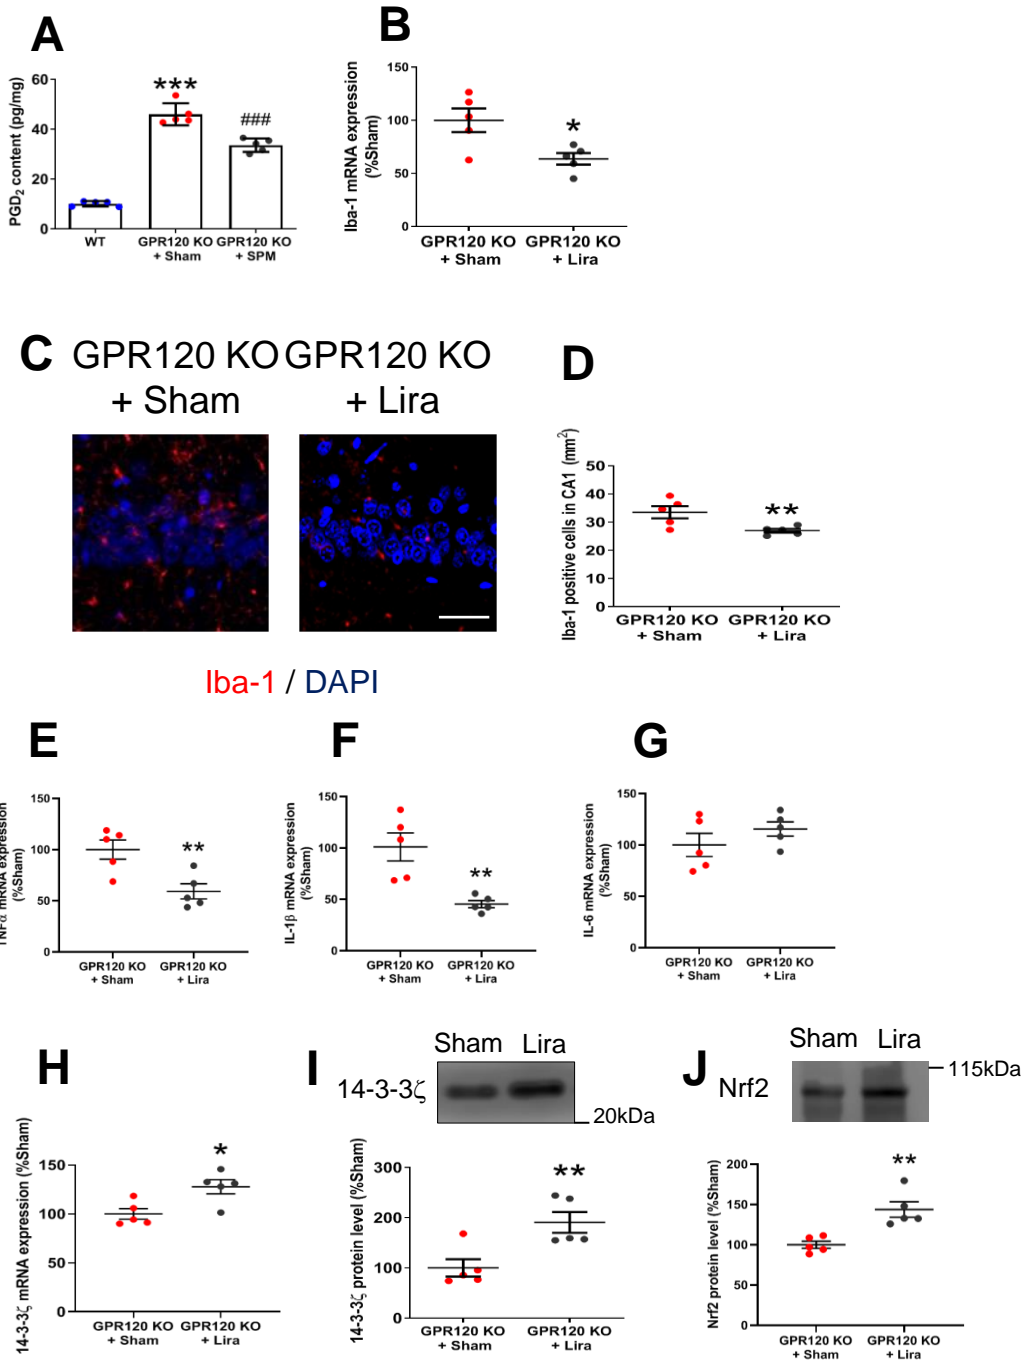

Supplement: 12974_2021_2361_MOESM5_ESM.pdf [file 12974_2021_2361_MOESM5_ESM.pdf]
